# Supplementary material
Source: Springer Nature journal article supplement (https://www.springermedizin.de/resource/supplementary/12967_2009_378_MOESM1_ESM.pdf/9576340)

### Troponin I (ng/ml)

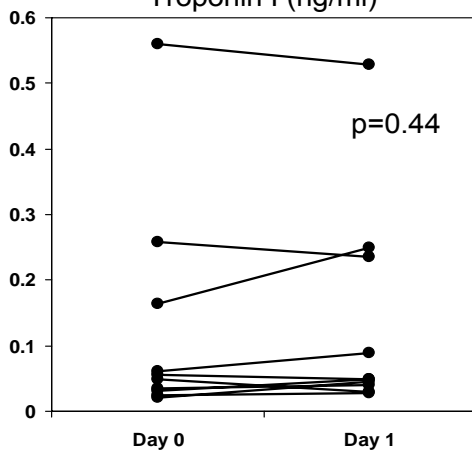

### Myoglobin (pg/ml)

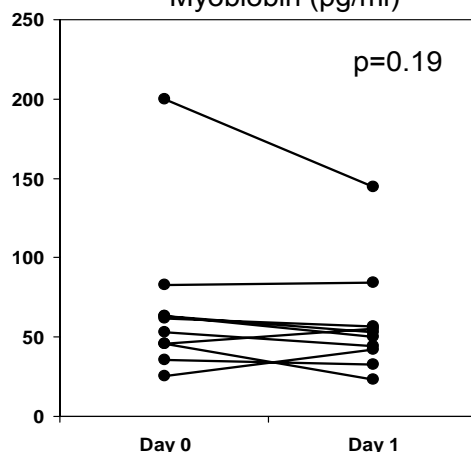

### Nt-pro-BNP (fmol/ml)

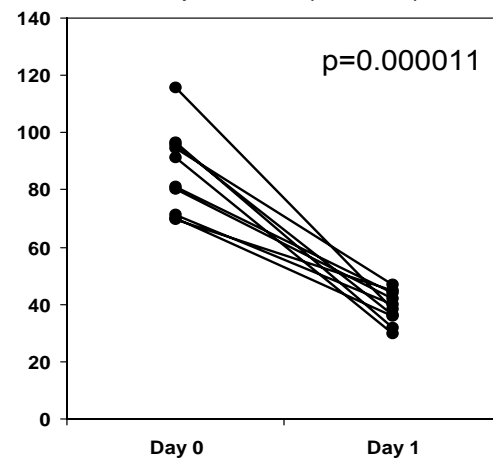

### TNF $\alpha$ (pg/ml)

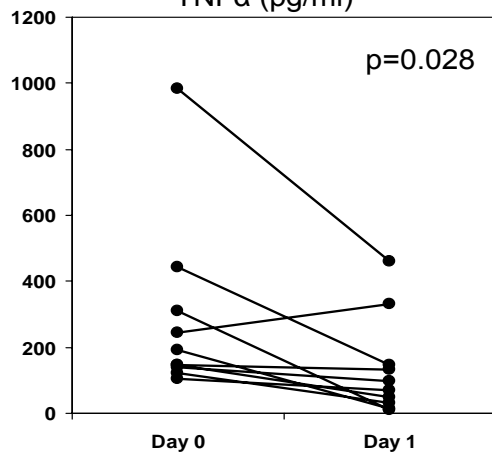

### Interleukin 6 (pg/ml)

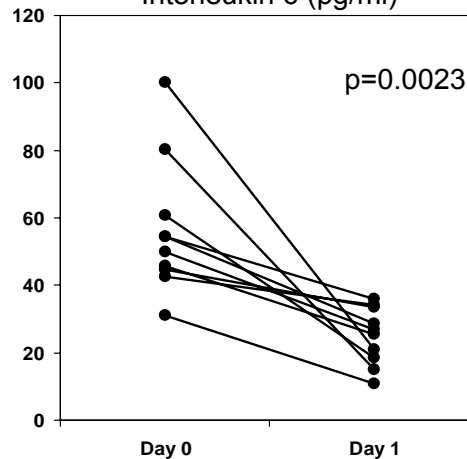

### sFAS (pg/ml)

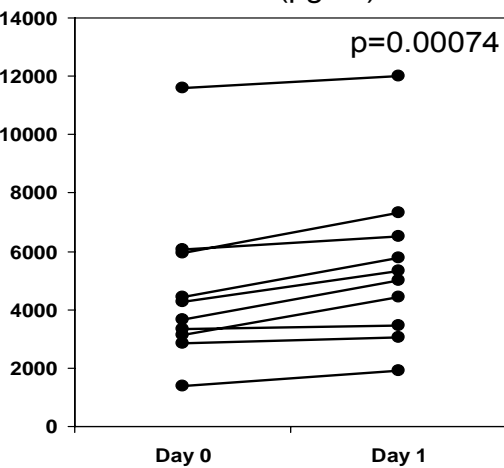

### FAS Ligand (pg/ml)

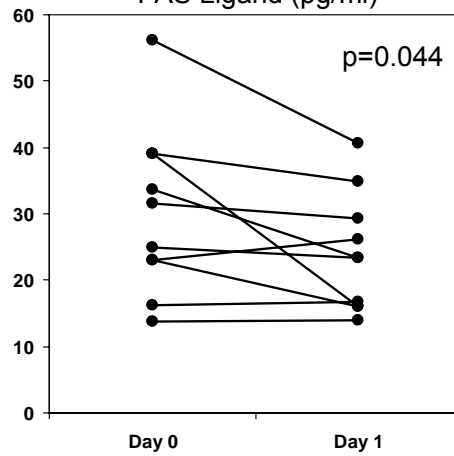

### sFas/Fas Ligand Ratio (pg/ml)

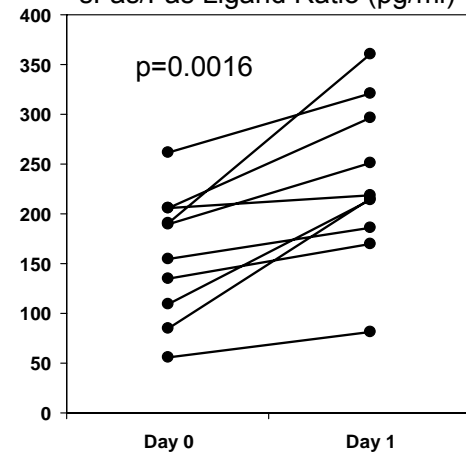

Supplement: MOESM1 [file 9576340]
